# Supplementary material
Source: PubMed Central journal article supplement (PMC4248985)
Supplement: JVI.01674-14_zjv999099799so1.pdf [file JVI.01674-14_zjv999099799so1.pdf]

shControl 10 min p.i. (LysoTracker + Dii-KSHV)

shCas 10 min p.i. (LysoTracker + Dii-KSHV)

A

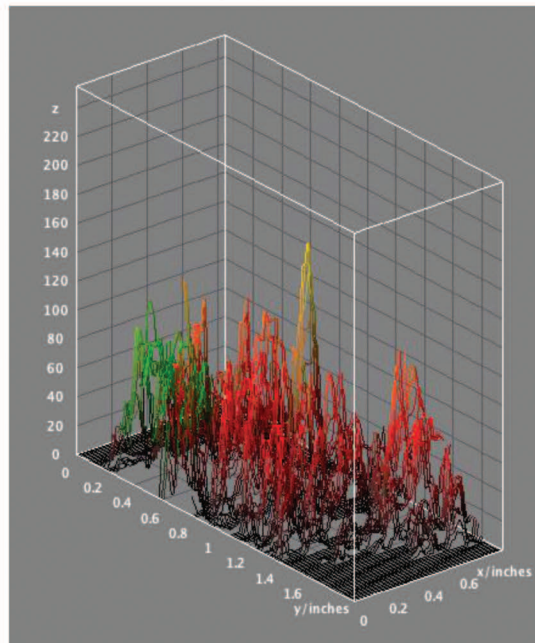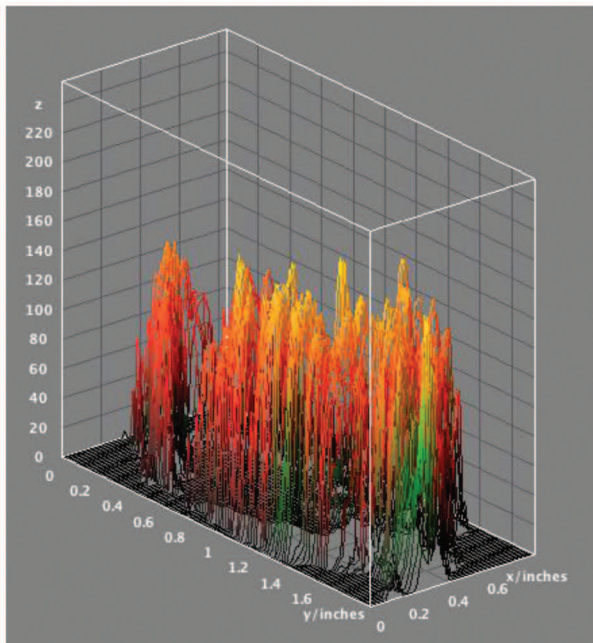

B

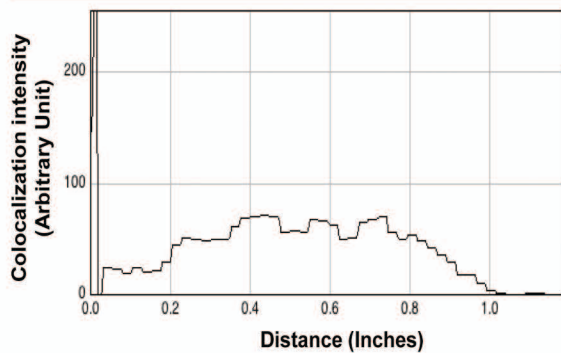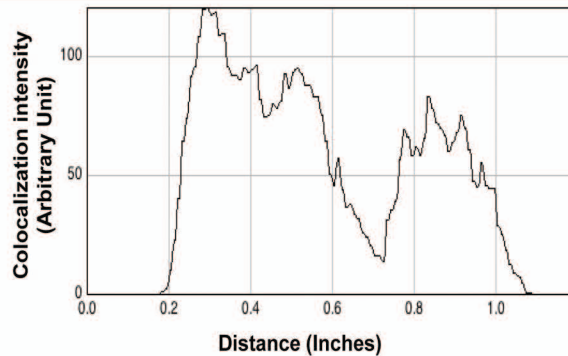

**Supplement material Figure legends.**

**Figure S1. Quantification of overlapping signal intensity between internalized KSHV and LysoTracker in shControl vs. shCas HMVEC-d cells.** Experiment was performed as described in Fig. 8. Signal intensity scans for LysoTracker (Ch1: green) and DiI-KSHV (Ch2: red) at ~10 min p.i., were overlapped (X-Y-Z axis) using Image J software. The obtained colocalization plot profile analysis in both control shRNA (A and B, left most top and bottom panel) and Cas shRNA (A and B, right most top and bottom panel) transduced HMVEC-d cells are shown. Interactive 3D surface plot on the X-Y-Z axis between LysoTracker (Ch1:green) and DiI-KSHV (Ch2:red) signal intensity, clearly depicted higher colocalization in shCas transduced HMVEC-d cells (Fig. S1.A, right most top panel) compared to control HMVEC-d cells (Fig. S1. A, left most top panel). Similar results were obtained by 2D signal intensity plot profile expressing colocalization values in arbitrary units on the Y-axis over distance (inches) on the X-axis (Fig. S1.B).

**Figure S2. Movie 1. Time-lapse video imaging of shControl HMVEC-d cells for monitoring colocalization specs between DiI-KSHV and LysoTracker during co-endocytosis.** Experiment was performed as described in Fig. 8 and Fig. S3 video was prepared as described in Fig 9.

**Figure S3. Movie 2. Time-lapse video imaging of shCas HMVEC-d cells for monitoring colocalization specs DiI-KSHV and LysoTracker during co-endocytosis.** Experiment was performed as described in Fig. 8 and Fig. S3 video was prepared as described in Fig 9.
